# Supplementary material for: Bioengineered Water-Responsive Carboxymethyl Cellulose/Poly(vinyl alcohol) Hydrogel Hybrids for Wound Dressing and Skin Tissue Engineering Applications
Source: MDPI journal article supplement (doi:10.3390/gels9020166), 2023-02-18
Supplement: s1 [file s1]

## Supplementary Materials

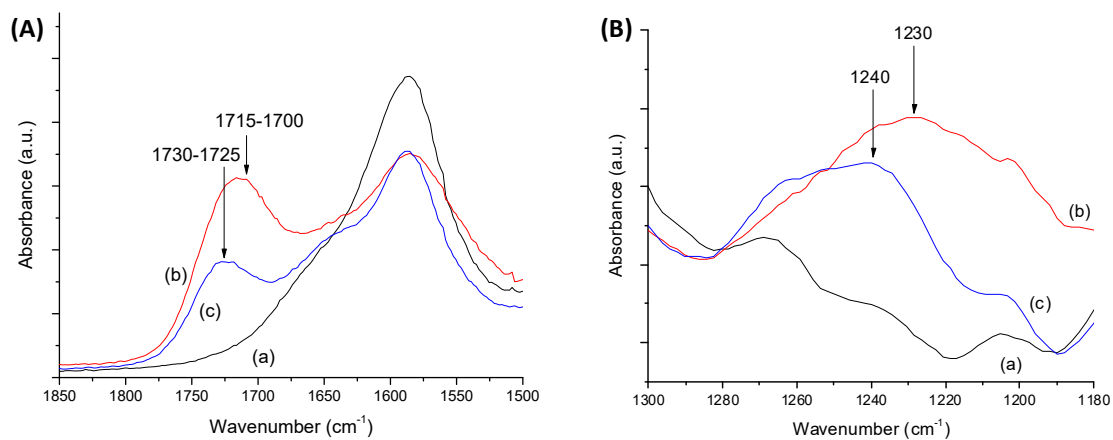

**Figure S1.** FTIR spectra in the range of (A) 1850–1500  $\text{cm}^{-1}$  and (B) 1300–1170  $\text{cm}^{-1}$  of (a) CMC-700\_CA0, (b) CMC-700\_CA25 as synthesized, and (c) CMC-700\_CA25 at pH 5.5.

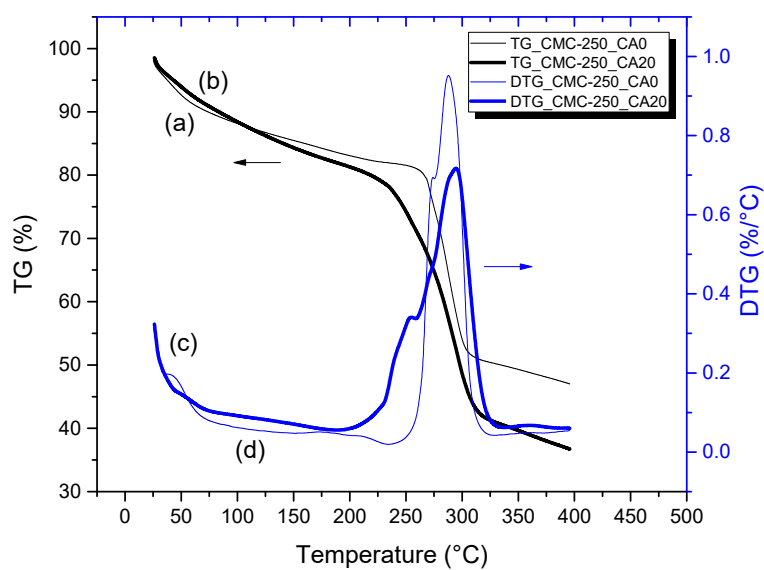

**Figure S2.** TG (a and b curves) and DTG (c and d curves) analysis of CMC-250\_CA0 (—) and CMC-700\_CA20 (—) hydrogels.

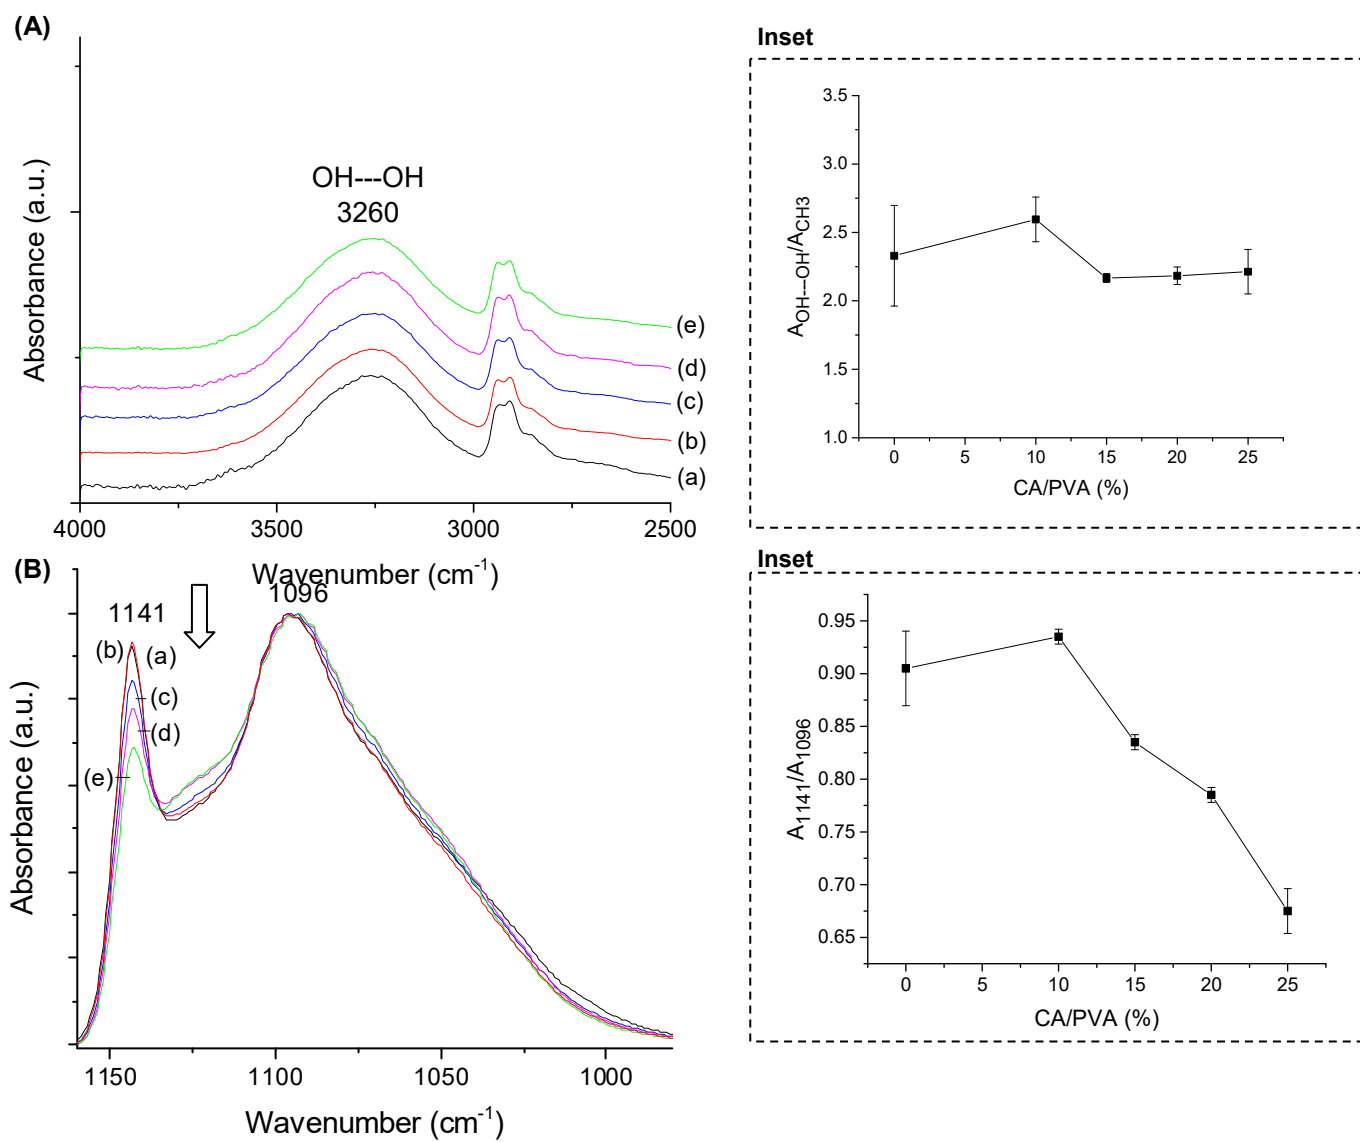

**Figure S3.** Evolution of (A) OH---OH ( $3260\text{ cm}^{-1}$ ) with increasing CA content (inset:  $A_{\text{OH---OH}}/A_{\text{CH}_3}$ ). (B) Evolution of crystallinity of PVA with increasing citric acid content (inset:  $A_{1141}/A_{1096}$ ).
